# Supplementary material for: Placenta Derived Mesenchymal Stem Cells Hosted on RKKP Glass-Ceramic: A Tissue Engineering Strategy for Bone Regenerative Medicine Applications
Source: Hindawi journal article supplement (doi:10.1155/2016/3657906), 2016-01-01
Supplement: f1 [file 3657906.f1.pdf]

## Supplementary information

### Materials and methods

#### hAMSC isolation and culture

Homogenous hAMSCs populations were obtained by a two-step procedure. Small pieces of amniotic membrane were treated for 1 hour with 0.25% trypsin-EDTA solution to remove human amniotic epithelial cells (hAEC). The supernatant was discarded, the amnion pieces were carefully washed in phosphate-buffered saline (PBS) and subsequently digested with 0.1% collagenase IV (Sigma-Aldrich, St. Louis, USA), 20 µg/ml DNase I (Sigma-Aldrich,) solution in Dulbecco's modified Eagle's medium (DMEM) for 2-3 hours [1]. The supernatant was transferred to fresh tubes and the enzymes were neutralized with Fetal Bovine Serum (FBS). The cells were spun down at 300 x g for 10 minutes and the pellet was suspended in DMEM supplemented with 10% FBS, penicillin (100 U/ml), streptomycin (100 µg/ml) (PBI international Milano, Italy) and Epidermal Growth Factor (EGF) (10ng/ml, ImmunoTools, Friesoythe, Germany). hAMSCs were cultured on the tissue-treated Petri dish and maintained at 37°C in a humidified atmosphere containing 5% CO<sub>2</sub>. Non-adherent cells were removed after 1 week and, when the culture reached 90% confluence, hAMSCs were harvested using 0.25% Trypsin-EDTA and sub-cultured at a density of 1×10<sup>4</sup> cells/cm<sup>2</sup> in the plastic Petri dish. The medium was subsequently changed every 3 days.

#### Cell proliferation and metabolic activity analysis

Exponentially growing cells were seeded both on the RKKP coated Ti surface and on the plastic Petri dish at a density of 1×10<sup>4</sup> cells/cm<sup>2</sup> and cultured up to 4 days. 10 mM Bromodeoxyuridine was added to the medium at day 1, 2, 3 and 4 after plating and maintained for 18 h in culture. Cells were then fixed and incubated for 30 min at room temperature with the anti-BrdU antibody (1:100; Cell Proliferation Kit; Roche Diagnostics). After incubation with 2,20-Azino-bis (3-ethylbenzothiazoline-6-sulfonic acid) for 30 min, the absorbance of 100µl of supernatant was measured in an ELISA reader (VICTOR3 multilabel readers; PerkinElmer, Waltham, Massachusetts) at 450 nm.

Exponentially growing hAMSCs were seeded both on the RKKP film surface and on the plastic Petri dish at a density of 1×10<sup>4</sup> cells/cm<sup>2</sup>, and cultured up to 4 days in a humidified incubator (37°C, 5% CO<sub>2</sub>). WST-1 reagent was added to the cell medium at a dilution of 1:10 at day 1, 2, 3 and 4, following plating. After 2 hours of

incubation in a humidified atmosphere, 100  $\mu$ l supernatant was transferred in 96-well plates and analysed by means of formazan dye. Quantification of the produced formazan dye was performed measuring the absorbance at 450 nm with an ELISA reader (VICTOR3 multilabel readers; PerkinElmer, Waltham, Massachusetts).

### **Real-Time quantitative RT-PCR analysis**

Experiments were conducted to contrast relative levels of each transcript and endogenous control Glyceraldehyde 3-phosphate dehydrogenase (GAPDH) in every sample. Gene expression was presented using the ( $2^{-DDCt}$ ) method, described by Livak and Schmittgen [2], where  $DCt = (\text{average target Ct} - \text{average GAPDH Ct})$ ,  $DDCt = (\text{average DCt treated sample} - \text{average DCt untreated sample})$ . We performed a validation experiment to prove that the amplification efficiency of target genes and reference GAPDH was equal. RT-PCR was performed with Sybr Green I Mastermix, using an ABI PRISM 7000 Sequence Detection System (Applied Biosystems, Foster City, CA, USA). Each reaction was run in triplicate and contained 0.5–1  $\mu$ L of cDNA template, with 250 nM primers in a final reaction volume of 25  $\mu$ L. The specific primers and annealing temperatures used are reported in Table S1. The annealing temperature used for all primers in this study is 60°C. Cycling parameters were: 50°C for 2 min, 95°C for 10 min (to activate DNA polymerase), then 40–45 cycles at 95°C for 15 s and 60°C for 1 min. Melting curves were performed using Dissociation Curves software (Applied Biosystems) to ensure that only a single product had been amplified. As negative controls, reactions were prepared, in which RNA or reverse transcriptase had previously been omitted during reverse transcription.

- [1] Casey M L and MacDonald P C 1996 Interstitial collagen synthesis and processing in human amnion: a property of the mesenchymal cells *Biol. reprod.* **55** 1253-60
- [2] Livak K J and Schmittgen T D 2001 Analysis of relative gene expression data using real-time quantitative PCR and the  $2^{-\Delta\Delta CT}$  method *Methods* **25** 402-8

**Table S1. Sequence of primer used for qRT-PCR**

| <b>Target gene</b> | <b>Primer sequence</b>                                     | <b>Annealing temperature (C°)</b> |
|--------------------|------------------------------------------------------------|-----------------------------------|
| VEGF               | 5'-cttgggtgcattggagcct-3'<br>5'-ctgcgctgatagacatccat-3'    | 60                                |
| $\beta$ -ACT       | 5'-gctcctcctgagcgcaag-3'<br>5'catctgctggaaggtggaca-3'      | 60                                |
| Ki67               | 5'-tgaacaaaaggcaaagaagac-3'<br>5'-gagctttccctattattatgg-3' | 60                                |
| IDO                | 5'-tgctaaaggcgtgtggaa-3'<br>5'-tacaccagaccgtctgatag-3'     | 60                                |
| HGF                | 5'-caatagcatgtcaagtggag-3'<br>5'-ctgtttcgtgtggtatcat -3'   | 60                                |
| TGF $\beta$ 1      | 5'-tcaagttaaagtggagcagc-3'<br>5'-actccggtgacatcaaaga-3'    | 60                                |
| RPL34              | 5'-gaaacatgtcagcagggcc-3'<br>5'-tgactctgtgcttgtgcctt-3'    | 60                                |
| RUNX2              | 5'-catcatctctgccccctct-3'<br>5'-actcttgcctgtccactc-3'      | 60                                |
| ALP                | 5'-caatgagggcaccgtggg-3'<br>5'-tcgtggtggtcacaatgcc-3'      | 60                                |
| OCL                | 5'-gcagcgaggtagtgaagag-3'<br>5'-gaaagccgatgtggtcagc-3'     | 60                                |
| GAPDH              | 5'-catcatctctgccccctct-3'<br>5'-caaagttgcatggatgacct-3'    | 60                                |
